# Supplementary material
Source: publisher figshare collection journal article supplement (https://acs.figshare.com/ndownloader/files/4520830)
Supplement: Supplementary file 1 [file 4520830]

## Accurate Determination of Order Parameters from $^1\text{H}$ , $^{15}\text{N}$ dipolar couplings in MAS solid-state NMR experiments

by

Veniamin Chevelkov, Uwe Fink and Bernd Reif

### Effect of radiofrequency inhomogeneity

The most severe source of error in the determination of  $^1\text{H}$ - $^{15}\text{N}$  dipolar couplings originates from rf field inhomogeneities which are intrinsic to any particular probe. The magnetization  $S_N$  which is transferred from  $^1\text{H}$  to  $^{15}\text{N}$  during CP (assuming the  $\pm 1$  Hartmann-Hahn matching condition) is calculated for a given CP contact time  $\tau$  according to<sup>1</sup>

$$S_N \propto \frac{|b_{\pm 1}|^2}{|b_{\pm 1}|^2 + (\Delta - \omega_r)^2} \sin\left\{\frac{\tau}{2} \sqrt{|b_{\pm 1}|^2 + (\Delta - \omega_r)^2}\right\}$$

where the  $\omega_r$  corresponds to the rotor spinning frequency, and  $\Delta = \omega_{1\text{H}} - \omega_{1\text{N}}$  to the rf fields difference applied on the proton and nitrogen channel, respectively.  $b_{\pm 1}$  is determined by the internuclear distance  $r_{\text{NH}}$  and the angle  $\beta$  between the principal axis of the  $^1\text{H}$ - $^{15}\text{N}$  dipolar tensor and the rotor axis

$$b_{\pm 1} = \frac{\sqrt{2}}{4} \frac{\gamma_H \gamma_N \hbar}{r_{\text{NH}}^3} \sin(2\beta)$$

$\hbar$  denotes Planck constant, the proton and nitrogen gyromagnetic ratios are given by  $\gamma_H$  and  $\gamma_N$ . A misadjustment of the CP condition due to rf inhomogeneity on either the  $^1\text{H}$  channel, the  $^{15}\text{N}$  channel or both, results in an apparently faster oscillations and yields an overestimation of the measured dipolar coupling. A  $^1\text{H}$ - $^{15}\text{N}$  dipolar coupling of 10 kHz corresponds to  $b_{\pm 1} = 7071$  Hz for spin pairs with  $\beta = 45^\circ$ . Already a rf field inhomogeneity on the order of 1 kHz increases significantly the apparent proton-nitrogen dipolar coupling (see Supporting Figure 1).

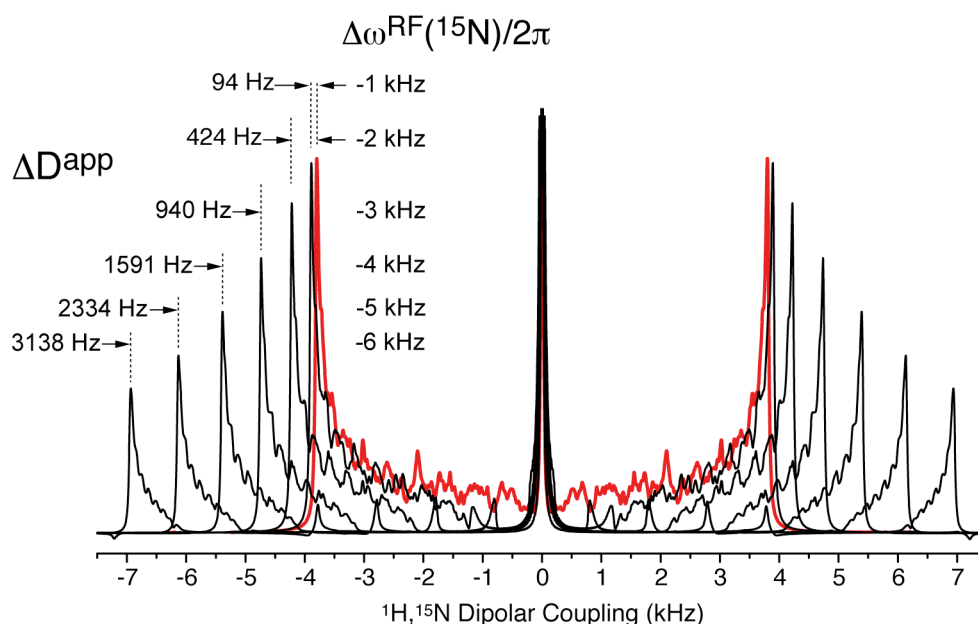

**Supporting Figure 1.** Effect of RF inhomogeneity on the apparent dipolar oscillation in a regular CP experiment. The spectra were simulated using the program SIMPSON.<sup>2</sup> In the ideal case, the  $^1\text{H}$  RF and  $^{15}\text{N}$  RF fields were set to 56 kHz and 36/76 kHz, respectively. For simulation of the effect of rotary resonance mismatch, the  $^{15}\text{N}$  RF field was decreased from 36 kHz to 30 kHz in steps of 1 kHz. Typical values for RF inhomogeneity on a standard triple resonance probe are on the order of 10 %. The MAS rotation frequency was assumed to be 20 kHz. A mismatch of 6 kHz of the  $^{15}\text{N}$  RF field results in almost a doubling of the apparent dipolar oscillation frequency.

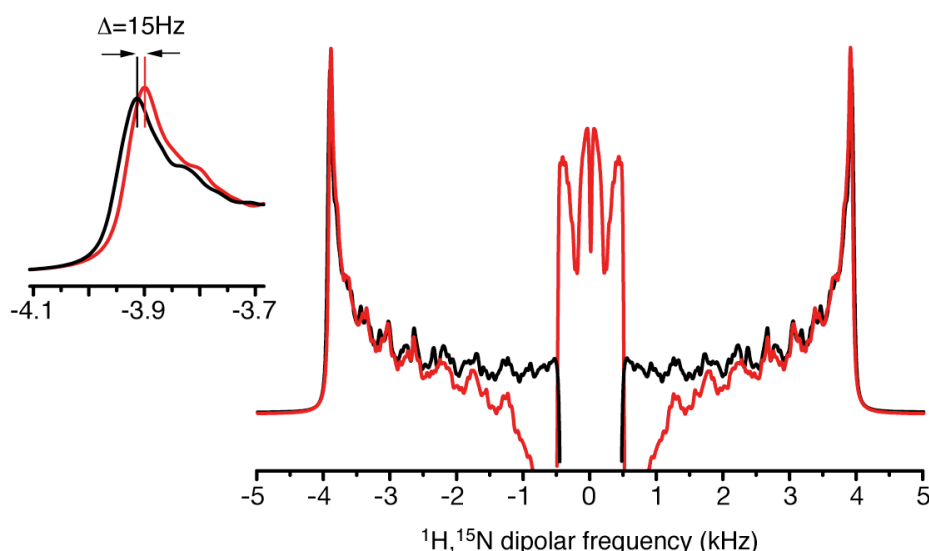

**Supporting Figure 2.** Simulation of  $^1\text{H}$ ,  $^{15}\text{N}$  dipolar oscillations in the Phase-Inverted CP experiment (CPPI) under RF inhomogeneity. The spectra were simulated using the program SIMPSON.<sup>2</sup> In the ideal case, the  $^1\text{H}$  RF and  $^{15}\text{N}$  RF fields were set to 56 kHz and 36/76 kHz, respectively. To simulate the effect of RF mismatch, the  $^{15}\text{N}$  RF field was set to 30/70 kHz. The MAS rotation frequency was assumed to be 20 kHz. RF inhomogeneity induces a variation of the dipolar oscillation in the order of 15 Hz.

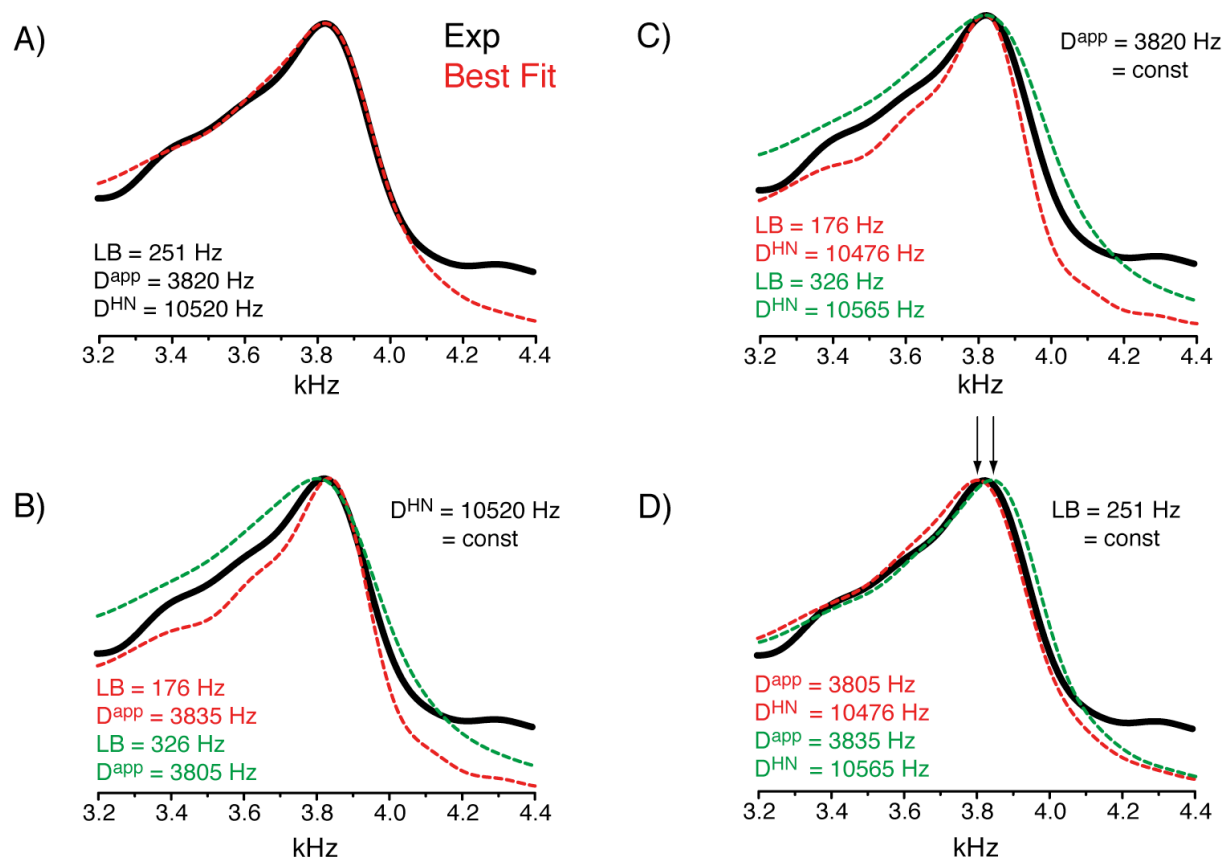

**Supporting Figure 3.** Estimation of the error in the determination of the  $^1\text{H}$ ,  $^{15}\text{N}$  dipolar couplings. In all panels, the right part of the doublet is drawn only. All panels display simulation and experimental data for the dipolar oscillation observed for residue K18. In all cases, simulated data are drawn as red or green dashed lines, whereas experimental data are represented by a solid line.

A) Experimental data and best fit. B) As the simulation program does not include a damping term to estimate the decay of magnetization, simulated data are apodized by multiplication with an exponentially decaying function.

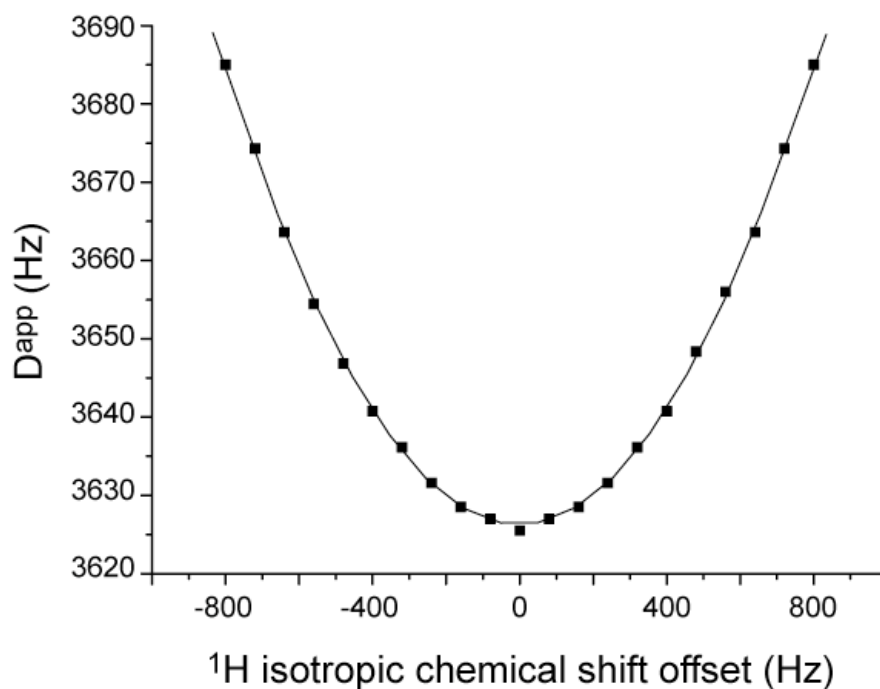

**Supporting Figure 4.** Dependence of the experimental dipolar splitting  $D^{app}$  in the CPPI experiment on the offset of the  $^1\text{H}^N$  isotropic chemical shift of an individual amide proton. Dipolar couplings shown in Figures 3 and 4 of the manuscript are corrected individually for chemical shift offset. The simulation was carried out using the program SIMPSON.<sup>2</sup>

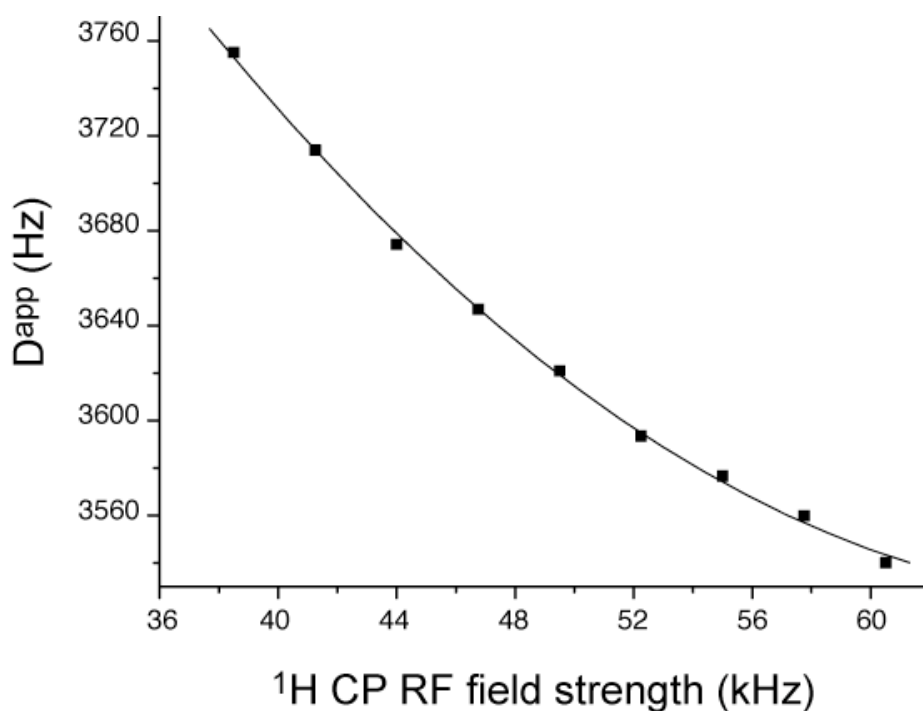

**Supporting Figure 5.** Dependence of the experimental dipolar splitting  $D^{app}$  on the  $^1\text{H}$  RF field strength employed in the CPPI experiment. Dipolar couplings represented in Figures 3 and 4 were analyzed using the experimental  $^1\text{H}$  RF field strengths values explicitly in the simulation.

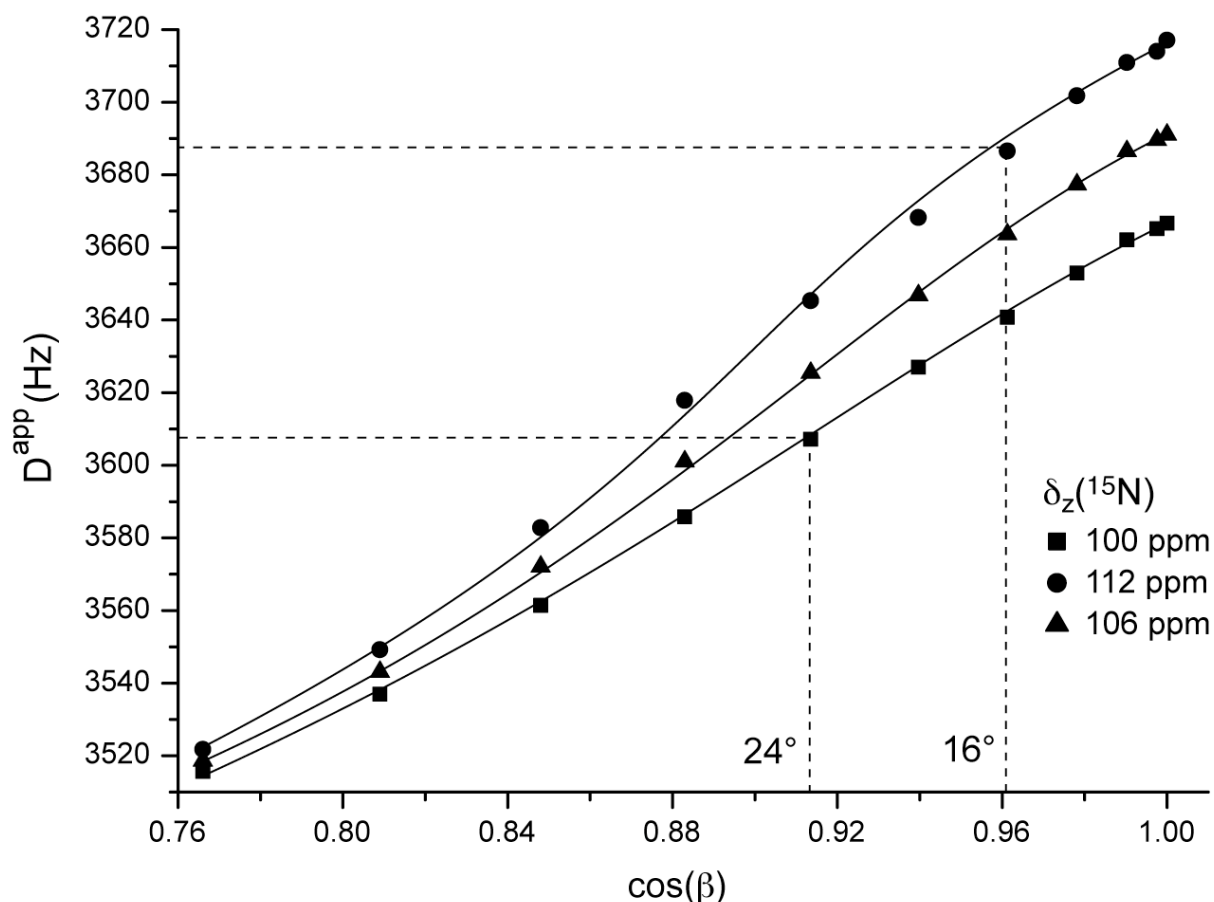

**Supporting Figure 6.** Dependence of the experimental dipolar splitting  $D^{\text{app}}$  on the  $^{15}\text{N}$  anisotropic chemical shift  $\delta_z$  and the angle  $\beta$  between the principal axis of the CSA tensor and the  $^1\text{H}$ - $^{15}\text{N}$  dipolar tensor. Typical values for the anisotropy of the  $^{15}\text{N}$  chemical shift are  $\Delta\delta = \delta_{\parallel} - \delta_{\perp} = 170 \pm 8$  ppm or  $\delta_z = 106 \pm 6$  ppm.<sup>3-7</sup> The tensor of the  $^{15}\text{N}$ - $^1\text{H}$  heteronuclear dipolar coupling is collinear with the  $^{15}\text{N}$ - $^1\text{H}$  bond and tilted approximately by around  $20^\circ$  with respect to the principal axis of the  $^{15}\text{N}$  CSA tensor.<sup>3, 5</sup> The simulation was carried out using the program SIMPSON.<sup>2</sup> The error induced by the uncertainty of the  $^{15}\text{N}$  CSA tensor parameters is the major determinant of the error in the  $^1\text{H}$ - $^{15}\text{N}$  CPPI dipolar recoupling experiment. Assuming a variation of  $\Delta\delta_z = \pm 6$  ppm around  $\delta_z = 106$  ppm and  $\Delta\beta = \pm 4^\circ$  around  $\beta_0 = 20^\circ$  yields an error of  $\pm 35$  Hz for the experimental dipolar splitting  $D^{\text{app}}$ . Assuming a scaling factor  $\kappa = 0.359$  for the CPPI experiment, this translates into an uncertainty in the determination of the  $^1\text{H}$ - $^{15}\text{N}$  dipolar coupling in the order of  $\pm 111$  Hz. This error is added on top of the error that is obtained in the analysis of the experimental CPPI spectra as shown in Supporting Figure 3.

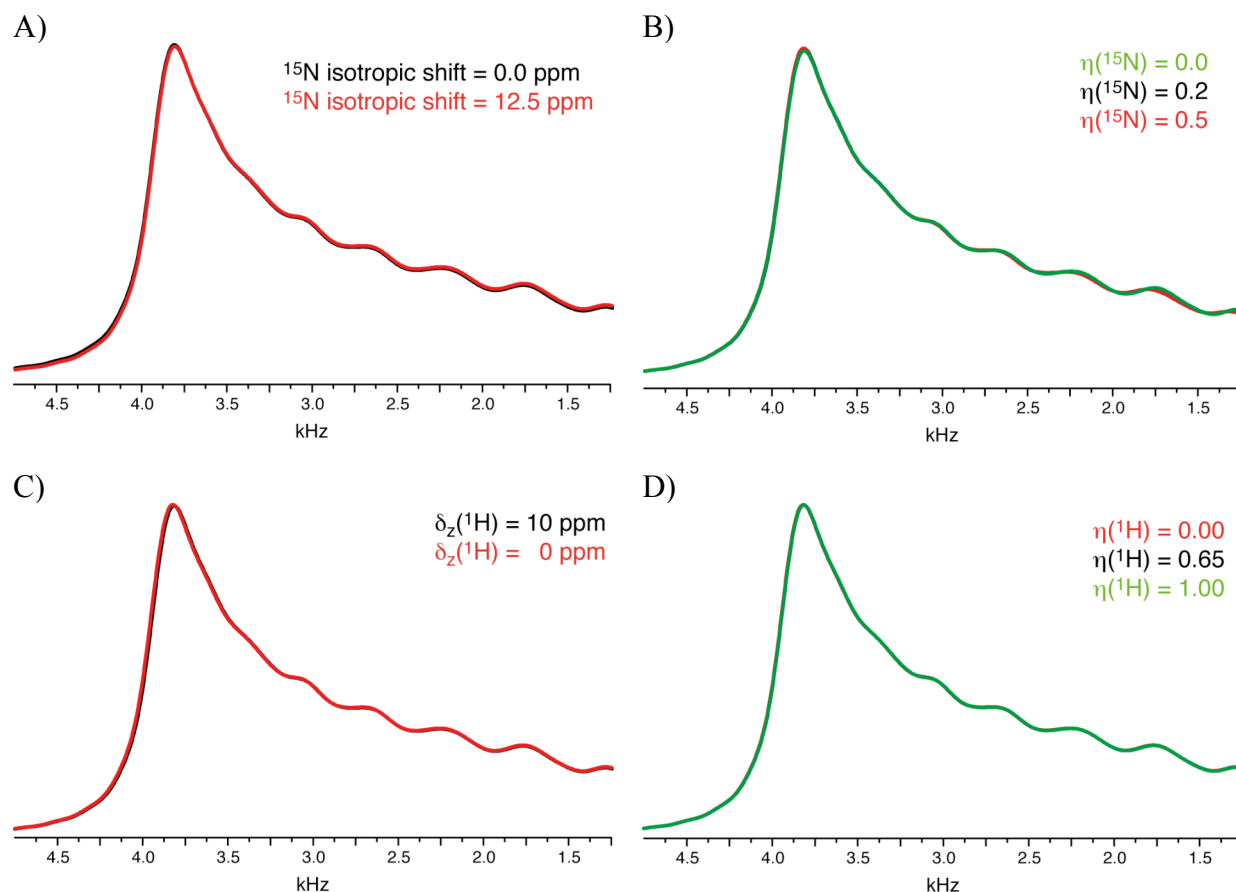

**Supporting Figure 7.** Influence of the isotropic  $^{15}\text{N}$  chemical shift (A), the asymmetry  $\eta$  of the  $^{15}\text{N}$  CSA tensor (B), the  $^1\text{H}$  chemical shift anisotropy (C) and the  $^1\text{H}$  chemical shift anisotropy  $\eta$  (D) on the apparent dipolar coupling  $D^{\text{app}}$  in the CPPI experiment. The simulations are carried out using the program SIMPSON.<sup>2</sup> We find virtually no influence of these parameters on the value of the extracted dipolar coupling.

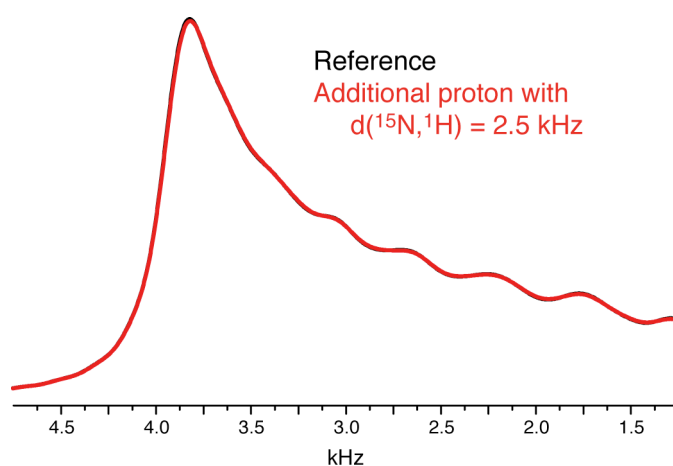

**Supporting Figure 8.** CPPI dipolar recoupling spectrum assuming that a second proton is interacting with the  $^{15}\text{N}$  nucleus. The simulations are carried out using the program SIMPSON.<sup>2</sup> The influence of the remote proton is not observable in the simulation.

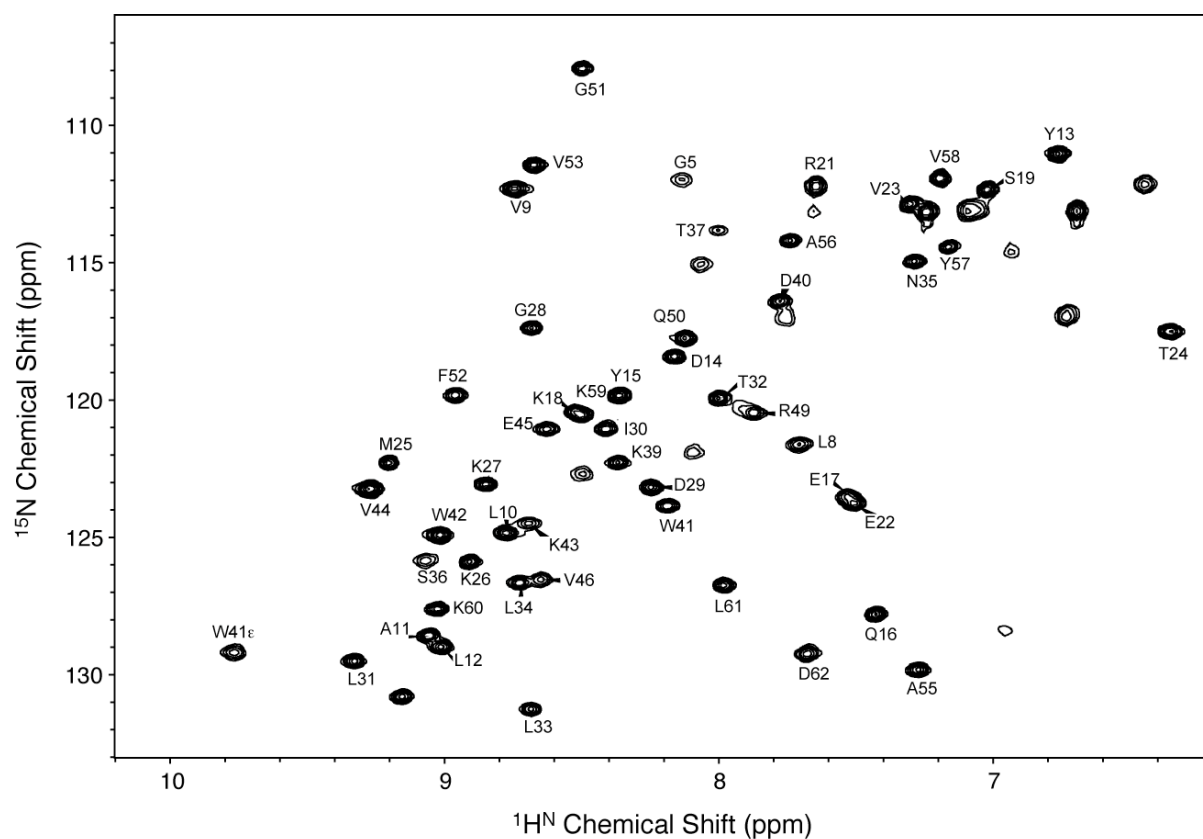

**Supporting Figure 9.**  $^1\text{H}$ ,  $^{15}\text{N}$  correlation experiment obtained for the  $\alpha$ -spectrin SH3 domain in the solid-state. Only those resonances are taken into account the above described analysis which are well resolved in the 2D correlation spectrum.

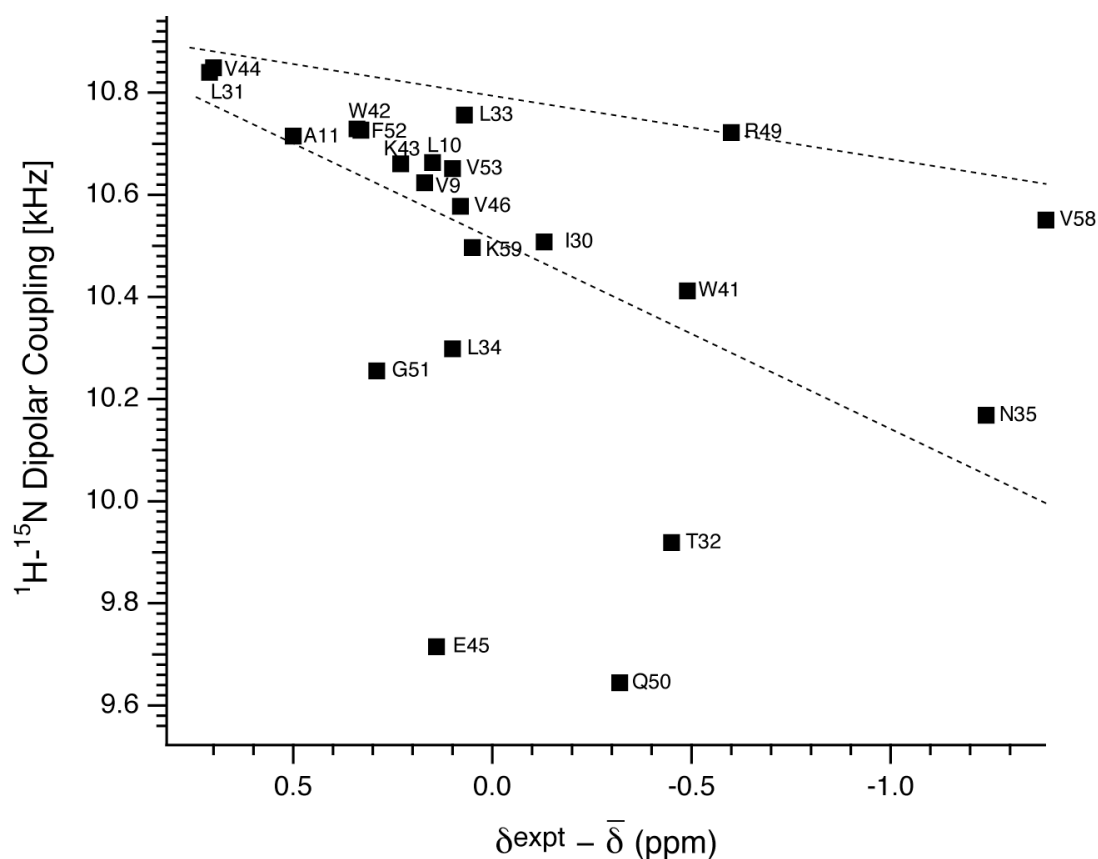

**Supporting Figure 10.** Correlation between the  $^1\text{H}$ ,  $^{15}\text{N}$  dipolar couplings as a function of the chemical shift difference between the experimental  $^1\text{H}^{\text{N}}$  chemical shifts and the average  $\text{H}^{\text{N}}$  chemical shifts as given in the BMRB ([http://www.bmrb.wisc.edu/published/ikura\\_cs\\_study/part1.html](http://www.bmrb.wisc.edu/published/ikura_cs_study/part1.html)). Only  $\beta$ -sheet residues are included in the plot. A similar trend as in the case of isotropic chemical shifts (Figure 3) is observed. We find the largest dipolar couplings for residues which are downfield shifted.



**Supporting Table 1.**  $^1\text{H}$ ,  $^{15}\text{N}$  dipolar couplings,  $^1\text{H}^{\text{N}}$  and  $^{15}\text{N}$  chemical shifts for  $\alpha$ -spectrin SH3 in the solid-state.

| Res | $^1\text{H}$ , $^{15}\text{N}$ dipolar coupling (Hz) | Error (Hz) | $^1\text{H}^{\text{N}}$ chemical shift (ppm) | $^{15}\text{N}$ chemical shift (ppm) |
|-----|------------------------------------------------------|------------|----------------------------------------------|--------------------------------------|
| L8  | 9282,29                                              | 750        | 7,82                                         | 120,88                               |
| V9  | 10623,37                                             | 375        | 8,89                                         | 111,63                               |
| L10 | 10726,50                                             | 300        | 8,92                                         | 124,17                               |
| A11 | 10714,66                                             | 225        | 9,20                                         | 127,86                               |
| L12 | 10651,00                                             | 225        | 9,15                                         | 128,22                               |
| Y13 | 10354,72                                             | 225        | 6,91                                         | 110,35                               |
| D14 | 10194,39                                             | 250        | 8,31                                         | 117,71                               |
| Y15 | 10420,94                                             | 300        | 8,50                                         | 119,14                               |
| Q16 | 10113,82                                             | 300        | 7,57                                         | 127,09                               |
| E17 | 10235,21                                             | 300        | 7,68                                         | 122,89                               |
| K18 | 10520,61                                             | 150        | 8,67                                         | 119,74                               |
| S19 | 9814,97                                              | 450        | 7,17                                         | 111,63                               |
| R21 | 7286,64                                              | 750        | 7,79                                         | 111,55                               |
| E22 | 10507,62                                             | 450        | 7,65                                         | 122,93                               |
| V23 | 10280,31                                             | 450        | 7,47                                         | 112,29                               |
| T24 | 9299,35                                              | 900        | 6,49                                         | 116,89                               |
| M25 | 10696,45                                             | 225        | 9,25                                         | 121,63                               |
| K26 | 10516,03                                             | 225        | 9,06                                         | 125,23                               |
| K27 | 10457,69                                             | 300        | 8,99                                         | 122,40                               |
| G28 | 10654,06                                             | 225        | 8,83                                         | 116,72                               |
| I30 | 10496,50                                             | 300        | 8,58                                         | 120,24                               |
| L31 | 10839,76                                             | 450        | 9,48                                         | 128,83                               |
| T32 | 9918,71                                              | 900        | 8,14                                         | 119,21                               |
| L33 | 10755,85                                             | 375        | 8,84                                         | 130,54                               |
| L34 | 10577,50                                             | 450        | 8,87                                         | 125,98                               |
| N35 | 10167,96                                             | 375        | 7,44                                         | 114,20                               |
| T37 | 10562,41                                             | 900        | 8,18                                         | 112,97                               |
| K39 | 10128,61                                             | 450        | 8,52                                         | 121,54                               |
| D40 | 10514,35                                             | 375        | 7,94                                         | 115,69                               |
| W41 | 10411,66                                             | 375        | 8,34                                         | 123,22                               |
| W42 | 10662,98                                             | 225        | 9,16                                         | 124,17                               |
| K43 | 10660,54                                             | 300        | 8,83                                         | 123,76                               |
| V44 | 10848,73                                             | 300        | 9,42                                         | 122,59                               |
| E45 | 10507,79                                             | 300        | 8,78                                         | 120,31                               |
| V46 | 10298,28                                             | 450        | 8,80                                         | 125,77                               |
| R49 | 9714,97                                              | 300        | 8,02                                         | 119,83                               |
| Q50 | 9644,18                                              | 300        | 8,26                                         | 117,10                               |
| G51 | 10255,16                                             | 225        | 8,64                                         | 107,25                               |
| F52 | 10728,84                                             | 225        | 9,11                                         | 119,11                               |
| V53 | 10651,12                                             | 300        | 8,82                                         | 110,82                               |
| A55 | 10533,34                                             | 150        | 7,43                                         | 129,17                               |
| A56 | 10399,06                                             | 225        | 7,90                                         | 113,56                               |
| Y57 | 10395,95                                             | 325        | 7,31                                         | 113,75                               |
| V58 | 10550,32                                             | 300        | 7,33                                         | 111,26                               |
| K59 | 10366,96                                             | 300        | 8,65                                         | 119,87                               |

|     |          |     |      |        |
|-----|----------|-----|------|--------|
| K60 | 10219,36 | 225 | 9,16 | 126,87 |
| L61 | 9961,91  | 225 | 8,12 | 126,06 |
| D62 | 6780,00  | 750 | 7,83 | 128,60 |

## REFERENCES

1. Wu, X. L.; Zilm, K. W., *J. Magn. Reson. A* 1993, 104 (2), 154-165.
2. Bak, M.; Rasmussen, J. T.; Nielsen, N. C., *J. Magn. Reson.* 2000, 147 (2), 296-330.
3. Chekmenev, E. Y.; Zhang, Q.; Waddell, K. W.; Mashuta, M. S.; Wittebort, R. J., *J. Am. Chem. Soc.* 2004, 126 (1), 379-384.
4. Franks, W. T.; Zhou, D. H.; Wylie, B. J.; Money, B. G.; Graesser, D. T.; Frericks, H. L.; Gurmukh, S.; Rienstra, C. M., *J. Am. Chem. Soc.* 2005, 127 (35), 12291-12305.
5. Wylie, B. J.; Franks, W. T.; Rienstra, C. M., *J. Phys. Chem. B* 2006, 110 (22), 10926-10936.
6. Hall, J. B.; Fushman, D., *J. Am. Chem. Soc.* 2006, 128 (24), 7855-7870.
7. Wylie, B. J.; Sperling, L. J.; Frericks, H. L.; Shah, G. J.; Franks, W. T.; Rienstra, C. M., *J. Am. Chem. Soc.* 2007, 129 (17), 5318-5319.
